# Supplementary material for: Design of stable and self-regulated microbial consortia for chemical synthesis
Source: PubMed Central journal article supplement (PMC8943006; doi:10.1038/s41467-022-29215-6), 2022-03-23
Supplement: 41467_2022_29215_MOESM1_ESM.pdf [file 41467_2022_29215_MOESM1_ESM.pdf]

**Design of stable and self-regulated microbial consortia for chemical  
synthesis**

*Li et. al*

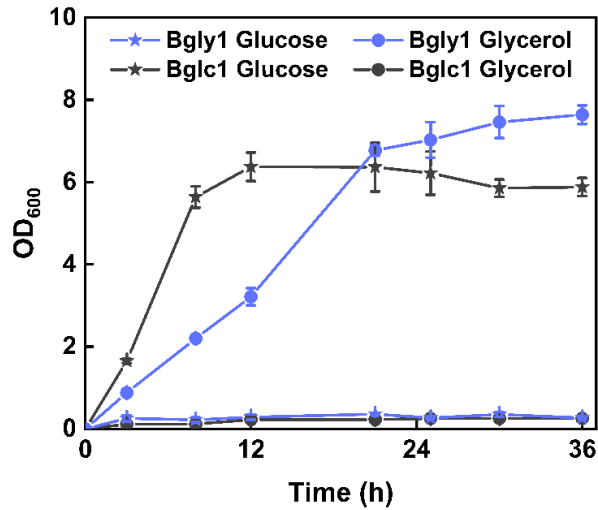

**Supplementary Fig. 1. Growth of glycerol-utilizing strain Bgly1 and glucose-utilizing strain Bglc1 in glucose and glycerol media, respectively.** Data shown are mean  $\pm$  s.d. (n = 3 independent experiments). Source data are provided as a Source Data file.

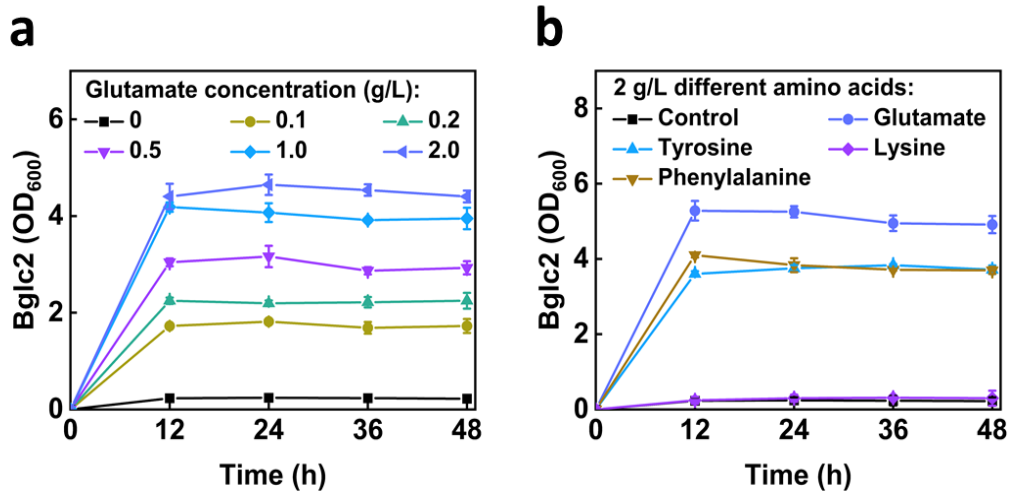

**Supplementary Fig. 2. Growth of Bglc2 in culture media supplemented with different amino acids. a** Growth with glutamate at different concentrations, **b** Growth with 2 g/L of each amino acid. Data shown are mean  $\pm$  s.d. (n = 3 independent experiments). Source data are provided as a Source Data file.

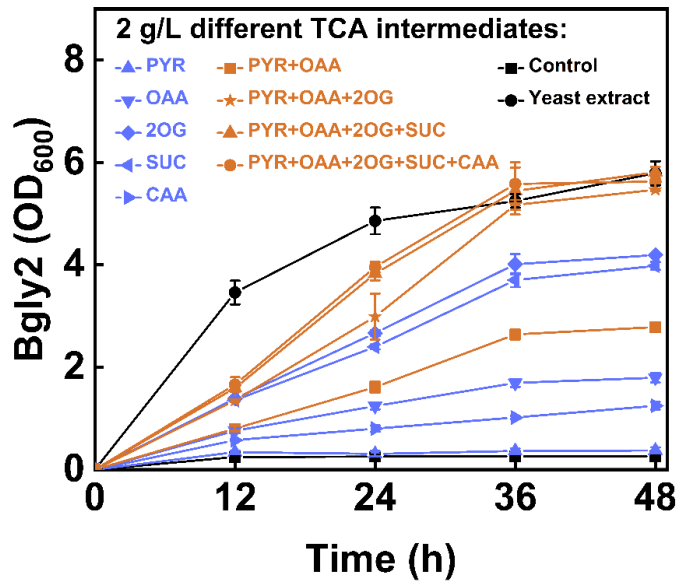

Supplementary Fig. 3. Growth curves of Bgly2 in culture media supplemented with different combinations of carboxylic acids at 2 g/L each. Data shown are mean  $\pm$  s.d. (n = 3 independent experiments). Source data are provided as a Source Data file.

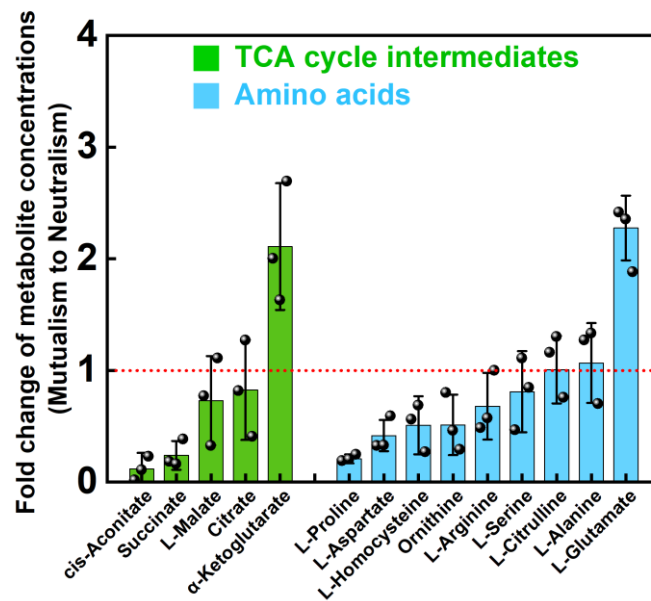

Supplementary Fig. 4. Metabolomic analysis of the supernatants of the neutral and the mutualistic cocultures. Samples were taken at 36h. Data shown are mean  $\pm$  SD (n=3 independent experiments). Source data are provided as a Source Data file.

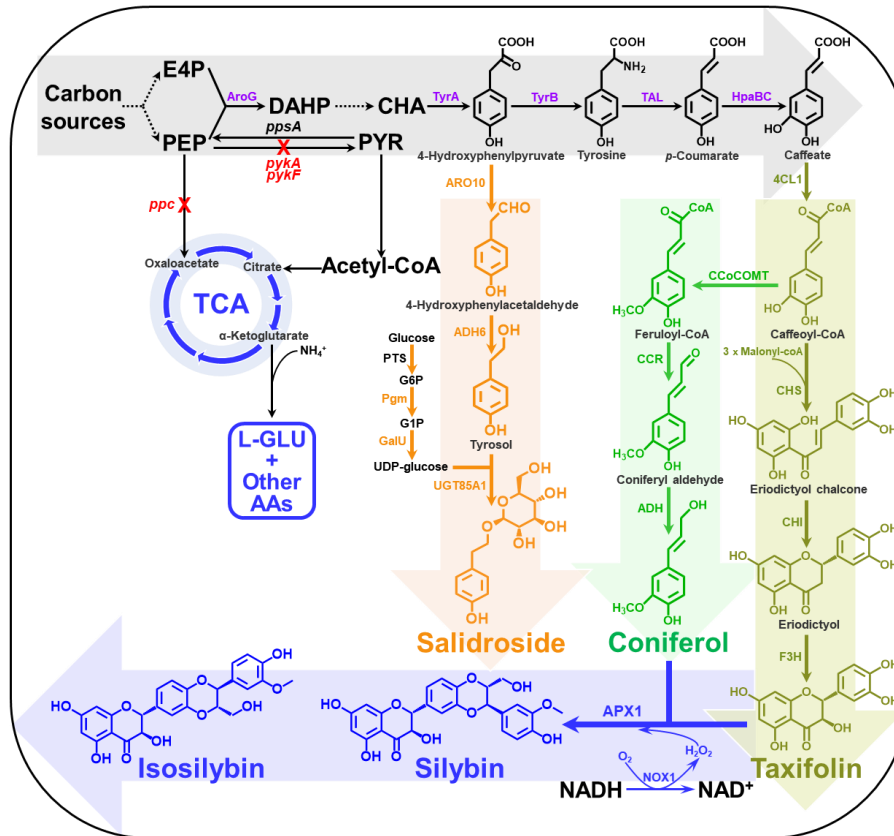

**Supplementary Fig. 5. Biosynthetic pathways of salidroside, coniferol and silybin/isosilybin.**

Genes: *ppc* encodes phosphoenolpyruvate carboxylase; *pykA/F* encodes pyruvate kinase; *ppsA* encodes phosphoenolpyruvate synthetase; Enzymes: AroG, 3-deoxy-7-phosphoheptulonate synthase; TyrA, prephenate dehydrogenase; TyrB, aromatic amino acid transaminase; TAL, tyrosine ammonia lyase; HpaBC, 4-hydroxyphenylacetic acid 3-hydroxylase; ARO10, ketoacid decarboxylase; ADH6, alcohol dehydrogenase; UGT85A1, glycosyltransferase; Pgm, phosphoglucomutase; GalU, UDP-glucose pyrophosphorylase; 4CL1, 4-coumarate-CoA ligase; CCoAOMT, caffeoyl-CoA O-methyltransferase; CCR, cinnamoyl-CoA reductase; ADH, alcohol dehydrogenase; CHS, chalcone synthase; CHI, chalcone isomerase; F3H, flavanone 3-hydroxylase; APX1, ascorbate peroxidase 1; NOX1, NADH oxidase. Metabolites: PEP, phosphoenolpyruvate; E4P, erythrose 4-phosphate; DAHP, 3-deoxy-7-phosphoheptulonate; CHA, chorismate; PYR, pyruvate; L-GLU, L-glutamate; G6P, glucose-6-phosphate; G1P, glucose-1-phosphate; UDP-glucose, uridine diphosphate glucose.

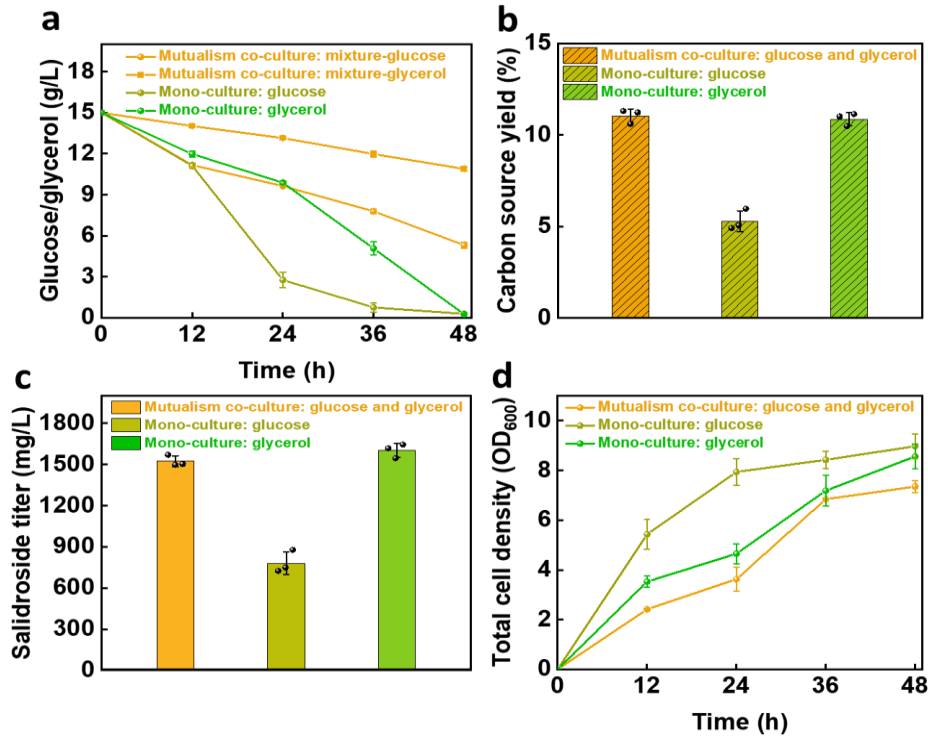

**Supplementary Fig. 6. Comparison of salidroside production in the monoculture and the coculture.** **a** Curves of carbon sources consumption, **b** Salidroside yields, **c** Salidroside titers, **d** Curves of cell growth. Strain BW-Sal was used in the monoculture while strains Bgly2-Tyr/Bglc2-Sal were used in the coculture. The IIR of the coculture is 1:1. Data shown are mean  $\pm$  SD (n=3 independent experiments). Source data are provided as a Source Data file.

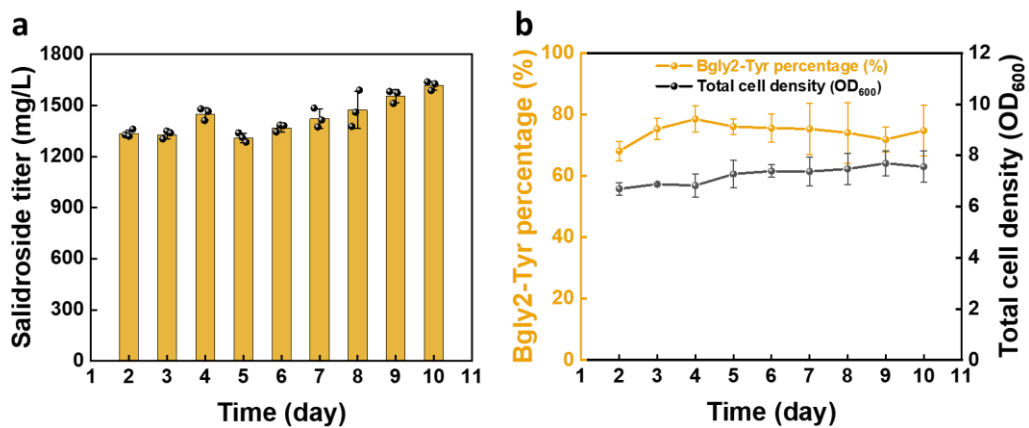

**Supplementary Fig. 7. Continuous passage cultivation of the mutualistic coculture.** **a** Salidroside titers, and **b** Population composition of each subculture. Data shown are mean  $\pm$  SD (n=3 independent experiments). Source data are provided as a Source Data file.

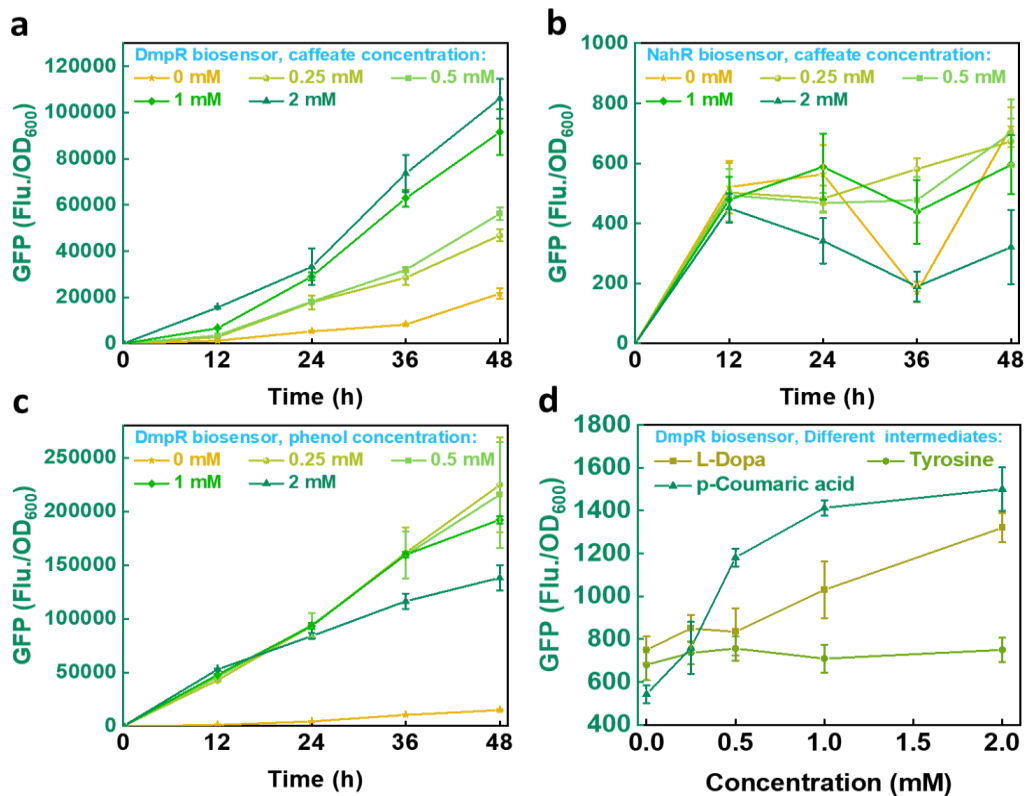

**Supplementary Fig. 8. Responsiveness of DmpR and NahR biosensors to different phenolic compounds.** a DmpR to caffeate, b NahR to caffeate, c DmpR to phenol and d DmpR to L-dopa, tyrosine and *p*-coumaric acid. Data shown are mean  $\pm$  s.d. (n = 3 independent experiments). Source data are provided as a Source Data file.

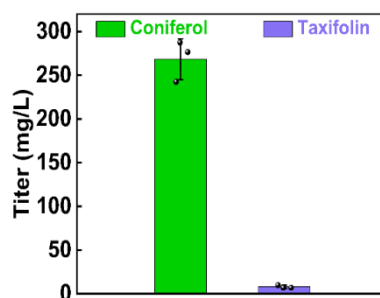

**Supplementary Fig. 9. Production of coniferol and taxifolin from caffeate.** Strains BW21513 (pZE-CA4C) and BW21513 (pZE-CCF4) were used. Caffeate (500 mg/L) was fed to the cell cultures, and samples were taken at 48 h. The Data shown are mean  $\pm$  s.d. (n = 3 independent experiments). Source data are provided as a Source Data file.

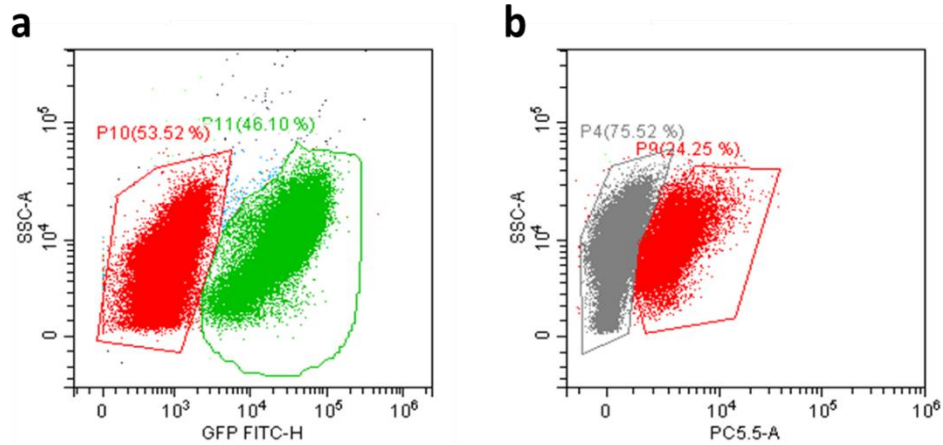

**Supplementary Fig. 10. Two examples of the flow cytometry results. a** Analysis of the population composition with green and red fluorescence. **b** Analysis of the population composition with/without red fluorescence. SSC-A, Side Scatter-Area; FITC-H, Fluoresce in Isothiocyanate-Height; PC5.5-A, Phycoerythrin Cyanin 5-Area.

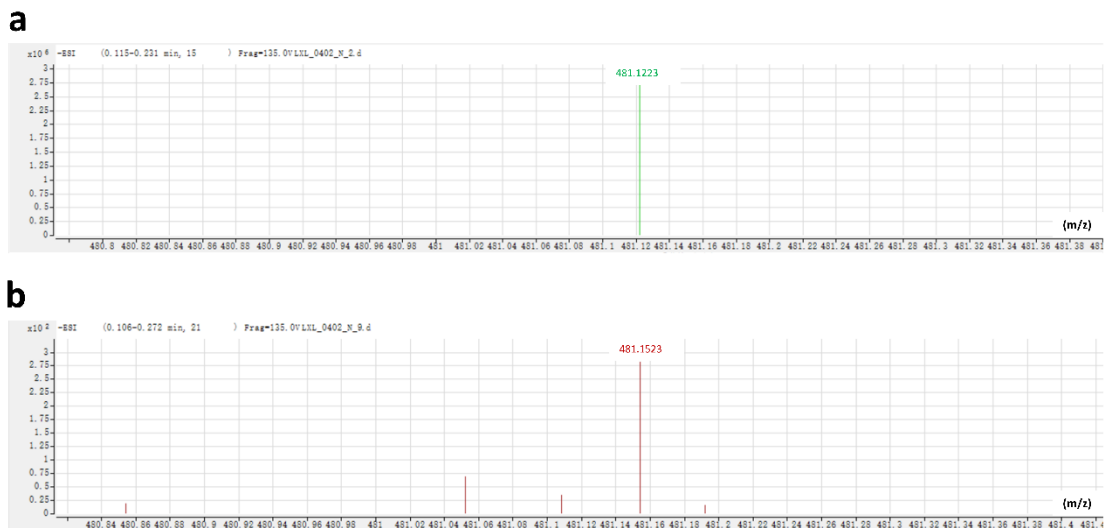

**Supplementary Fig. 11. ESI-MS results of silybin/isosilybin. a** The standard, **b** The sample. Source data are provided as a Source Data file.

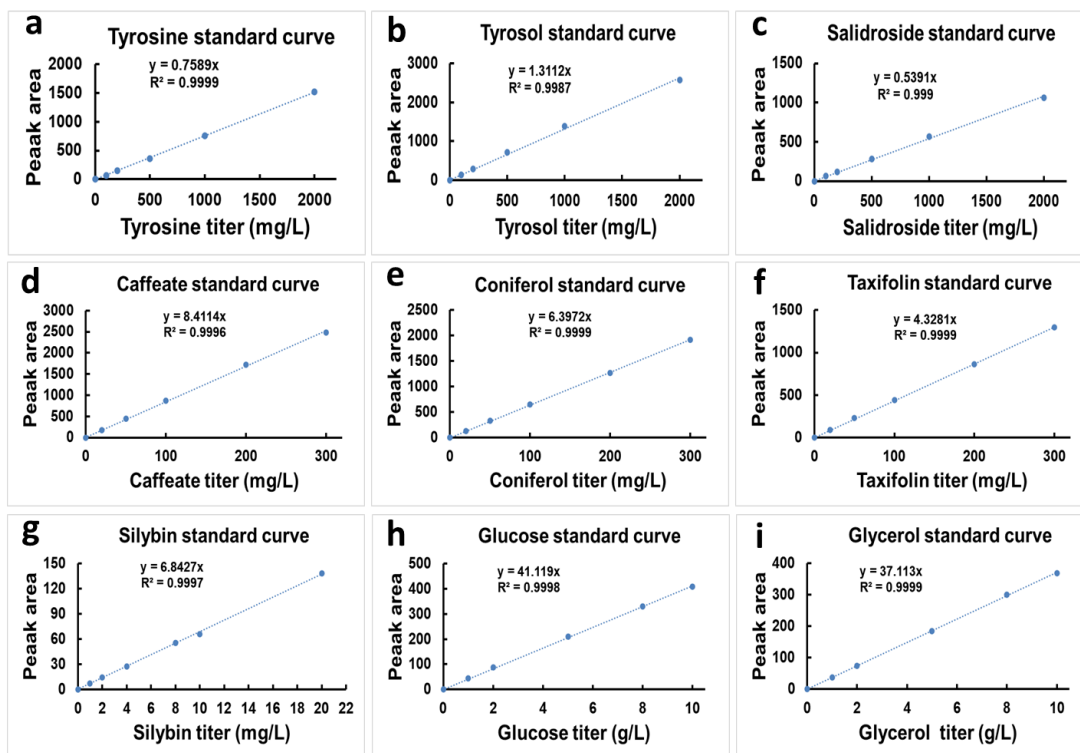

**Supplementary Fig. 12. Standard curves of the related compounds in HPLC. a** Tyrosine, **b** Tyrosol, **c** Salidroside, **d** Caffeate, **e** Coniferol, **f** Taxifolin, **g** Silybin/isosilybin, **h** Glucose and **i** Glycerol. Source data are provided as a Source Data file.



**Supplementary Table 1. Strains used in this study.**

| <b>Strains</b> | <b>Description</b>                                                                                         | <b>Source</b>               |
|----------------|------------------------------------------------------------------------------------------------------------|-----------------------------|
| BW25113        | <i>rrnBT14 ΔlacZWJ16 hsdR514 ΔaraBADAH33<br/>ΔrhaBADLD78</i>                                               | Coli genome<br>stock center |
| BW25113ΔpykAF  | BW25113ΔpykAΔpykF                                                                                          | 1                           |
| Bgly1          | BW25113ΔpykAΔpykFΔptsGΔglkΔmanXYZ                                                                          | This study                  |
| Bglc1          | BW25113Δglpk                                                                                               | This study                  |
| Bgly2          | BW25113ΔpykAΔpykFΔptsGΔglkΔmanXYZΔppc                                                                      | This study                  |
| Bglc2          | BW25113ΔglpkΔgdhAΔgltBD                                                                                    | This study                  |
| Bgly1-Tyr      | Bgly1, pZE12-luc and pCS-TPTA and pSA-mcherry                                                              | This study                  |
| Bglc1-Sal      | BGlc1, pZE-ugt85A1 and pCS-pg and pSA-AA                                                                   | This study                  |
| Bgly2-Tyr      | Bgly2, pZE12-luc and pCS-TPTA and pSA-mcherry                                                              | This study                  |
| Bglc2-Sal      | Bglc2, pZE-ugt85A1 and pCS-pg and pSA-AA                                                                   | This study                  |
| BW-Sal         | BW25113ΔpykAF, pZE-ugt85A1 and pCS-TPTA-pg and<br>pSA-AA                                                   | This study                  |
| Bgly2-Caf      | Bgly2, pZE-TAL and pCS-TH and pSA-mcherry                                                                  | This study                  |
| Bglc2-Con      | Bglc2, pZE-CA4C and pCS27 and pSA-eGFP                                                                     | This study                  |
| Bglc2-ConDmpR  | Bglc2, pZE-CA4C and pCS27 and pSA-P <sub>dmp</sub> -GS-P <sub>J23101</sub> -dmpR                           | This study                  |
| Bglc2-Sil      | Bglc2, pZE-CA and pCS-CF4C-P <sub>J23101</sub> -CA and<br>pSA-P <sub>dmp</sub> -GS-P <sub>J23101</sub> -DN | This study                  |
| Bglc2-Con(b)   | Bglc2, pZE12-luc and pCS-4C-P <sub>J23101</sub> -CA and pSA-eGFP                                           | This study                  |
| Bglc2-Sil(b)   | Bglc2, pZE-CA and pCS-CF4 and pSA-P <sub>dmp</sub> -GS-P <sub>J23101</sub> -DN                             | This study                  |

**Supplementary Table 2. Plasmids used in this study.**

| Plasmids                                           | Description                                                                                                                                                                     | Source     |
|----------------------------------------------------|---------------------------------------------------------------------------------------------------------------------------------------------------------------------------------|------------|
| pZE12-luc                                          | P <sub>L</sub> lacO1, <i>colE</i> ori, <i>luc</i> , <i>Amp</i> <sup>R</sup>                                                                                                     | 1          |
| pCS27                                              | P <sub>L</sub> lacO1, <i>P15A</i> ori, <i>Kan</i> <sup>R</sup>                                                                                                                  | 1          |
| pSA74                                              | P <sub>L</sub> lacO1, <i>pSC101</i> ori, <i>CI</i> <sup>R</sup>                                                                                                                 | 1          |
| pCS-TPTA                                           | pCS27, <i>tyrA</i> , <i>ppsA</i> , <i>tktA</i> and <i>aroG</i> from <i>E. coli</i>                                                                                              | 1          |
| pSA-mcherry                                        | pSA74, <i>mcherry</i>                                                                                                                                                           | This study |
| pZE-ugt85A1                                        | pZE12-luc, <i>ugt85A1</i> from <i>Arabidopsis thaliana</i>                                                                                                                      | This study |
| pCS-pg                                             | pCS27, <i>pgm</i> and <i>galU</i> from <i>E. coli</i>                                                                                                                           | This study |
| pSA-AA                                             | pSA74, <i>aro10</i> and <i>adh6</i> from <i>Saccharomyces cerevisiae</i>                                                                                                        | This study |
| pZE-TAL                                            | pZE12-luc, <i>tal</i> from <i>Rhodobacter glutinis</i>                                                                                                                          | 2          |
| pCS-TH                                             | pCS27, <i>tyrA</i> , <i>ppsA</i> , <i>tktA</i> , <i>aroG</i> and <i>hpaBC</i> from <i>E. coli</i>                                                                               | 1          |
| pZE-CCF4                                           | pZE12-luc, <i>chs</i> from <i>Petunia x hybrida</i> , <i>chi</i> from <i>Medicago sativa</i> , <i>f3h</i> from <i>Camellia sinensis</i> and <i>4cl1</i> from <i>A. thaliana</i> | This study |
| pZE-CA4C                                           | pZE12-luc, <i>ccr</i> from <i>Leucaena leucocephala</i> , <i>adh</i> from <i>S.cerevisiae</i> , <i>4cl1</i> , <i>ccoamt</i> from <i>A. thaliana</i>                             | 2          |
| pSA-eGFP                                           | pSA74, <i>egfp</i>                                                                                                                                                              | This study |
| pSA- P <sub>J23101</sub> -dmpR                     | pSA74, P <sub>J23101</sub> promoter, <i>dmpR</i> from <i>Pseudomonas CF600</i>                                                                                                  | This study |
| pSA- P <sub>J23101</sub> -nahR                     | pSA74, P <sub>J23101</sub> promoter, <i>nahR</i> from <i>Pseudomonas putida</i>                                                                                                 | This study |
| pZE-P <sub>dmp</sub> -eGFP                         | pZE12-luc, <i>egfp</i> with P <sub>dmp</sub> promoter                                                                                                                           | This study |
| pZE-P <sub>nah</sub> -eGFP                         | pZE12-luc, <i>egfp</i> with P <sub>nah</sub> promoter                                                                                                                           | This study |
| pSA-P <sub>dmp</sub> -GS-P <sub>J23101</sub> -dmpR | pSA74, <i>gdhAssrA</i> from <i>E. coli</i> with P <sub>dmp</sub> promoter and <i>dmpR</i> with P <sub>J23101</sub> promoter                                                     | This study |
| pSA-P <sub>dmp</sub> -GS-P <sub>J23101</sub> -DN   | pSA74, <i>gdhAssrA</i> with P <sub>dmp</sub> promoter, <i>dmpR</i> and <i>nox1</i> (from <i>Lactococcus lactis</i> ) with P <sub>J23101</sub> promoter                          | This study |
| pZE-APX1                                           | pZE12-luc, <i>apx1</i> from <i>Silybum marianum</i>                                                                                                                             | This study |
| pCS-P <sub>lac</sub> -CF4C-P <sub>J23101</sub> -CA | pCS27, <i>chi</i> , <i>f3h</i> , <i>4cl1</i> and <i>ccoamt</i> with P <sub>lac</sub> promoter, <i>ccr</i> and <i>adh</i> with P <sub>J23101</sub> promoter                      | This study |
| pZE-CHS                                            | pZE12-luc, <i>chs</i>                                                                                                                                                           | This study |
| pCS-CF4                                            | pCS27, <i>chi</i> , <i>f3h</i> and <i>4cl1</i>                                                                                                                                  | This study |
| pZE-CA                                             | pZE12-luc, <i>chs</i> and <i>apx1</i>                                                                                                                                           | This study |
| pCS-4C-P <sub>J23101</sub> -CA                     | pCS27, <i>4cl1</i> and <i>ccoamt</i> with P <sub>lac</sub> promoter, <i>ccr</i> and <i>adh</i> with P <sub>J23101</sub> promoter                                                | This study |
| pSA-P <sub>J23101</sub> -NOX1                      | pSA74, <i>nox1</i> with P <sub>J23101</sub> promoter                                                                                                                            | This study |

### Supplementary references

1. Li, X. et al. Establishing an artificial pathway for efficient biosynthesis of hydroxytyrosol. *ACS Synth Biol* **7**, 647-654 (2018).
2. Chen, Z., Sun, X., Li, Y., Yan, Y. & Yuan, Q. Metabolic engineering of *Escherichia coli* for microbial synthesis of monolignols. *Metab Eng* **39**, 102-109 (2017).
