# Supplementary material for: Design of stable and self-regulated microbial consortia for chemical synthesis
Source: PubMed Central journal article supplement (PMC8943006; doi:10.1038/s41467-022-29215-6), 2022-03-23
Supplement: 41467_2022_29215_MOESM3_ESM.pdf [file 41467_2022_29215_MOESM3_ESM.pdf]

### **Description of Additional Supplementary Files**

File Name: Supplementary Data 1

Description: Oligonucleotides used in this study
